# Supplementary material for: A narrative review of primary spontaneous pneumomediastinum: a poorly understood and resource-intensive problem
Source: PubMed Central journal article supplement — J Thorac Dis. 2021 Jun;13(6):3721–30. doi: 10.21037/jtd-21-193 (PMC8264673; doi:10.21037/jtd-21-193), 2021-06
Supplement: jtd-13-06-3721-supplementary.pdf [file jtd-13-06-3721-supplementary.pdf]

**Table S1** Vitals of primary spontaneous pneumomediastinum patients

| Study                            | Fever                 | Tachycardia         | Hypotension | Tachypnea | Hypoxemia |
|----------------------------------|-----------------------|---------------------|-------------|-----------|-----------|
| Abolnik <i>et al.</i> 1991       | NR                    | NR                  | NR          | NR        | NR        |
| Kaneki <i>et al.</i> 2000        | NR                    | NR                  | NR          | NR        | NR        |
| Gerazounis <i>et al.</i> 2003    | NR                    | NR                  | NR          | NR        | NR        |
| Jougon <i>et al.</i> 2003        | NR                    | 0                   | 0           | NR        | NR        |
| Koullias <i>et al.</i> 2004      | NR                    | NR                  | NR          | NR        | NR        |
| Weissberg & Weissberg 2004       | 32                    | 7                   | NR          | NR        | NR        |
| Campillo-soto <i>et al.</i> 2005 | NR                    | 5.6                 | NR          | 5.6       | NR        |
| Newcomb & Clarke 2005            | NR                    | NR                  | NR          | NR        | NR        |
| Freixinet <i>et al.</i> 2005     | NR                    | NR                  | NR          | NR        | NR        |
| Macia <i>et al.</i> 2007         | 14.6                  | NR                  | NR          | NR        | NR        |
| Mondello <i>et al.</i> 2007      | 22                    | NR                  | NR          | NR        | 33**      |
| Caceres <i>et al.</i> 2008       | NR                    | NR                  | NR          | NR        | NR        |
| Al-Mufarrej <i>et al.</i> 2008   | 5.9                   | NR                  | NR          | NR        | NR        |
| Takada <i>et al.</i> 2008        | 28*                   | NR                  | NR          | NR        | NR        |
| Perna <i>et al.</i> 2010         | NR                    | NR                  | NR          | NR        | NR        |
| Ryoo 2012                        | NR                    | NR                  | NR          | NR        | NR        |
| Okada <i>et al.</i> 2014         | 10                    | NR                  | NR          | NR        | NR        |
| Bakhos <i>et al.</i> 2014        | NR                    | NR                  | NR          | NR        | NR        |
| Ebina <i>et al.</i> 2017         | NR                    | NR                  | NR          | NR        | NR        |
| AVE $\pm$ std dev % [n]          | 18.8% $\pm$ 10.3% [6] | 4.2% $\pm$ 3.7% [3] | 0 [1]       | 5.6 [1]   | 33 [1]    |

\*, fever defined as temperature  $>37.2$  °C; \*\*, mild hypoxemia.

**Table S2** Leukocytosis and WBC

| Study                            | Leukocytosis (%) | WBC×10 <sup>3</sup> |
|----------------------------------|------------------|---------------------|
| Abolnik <i>et al.</i> 1991       | NR               | NR                  |
| Kaneki <i>et al.</i> 2000        | NR               | NR                  |
| Gerazounis <i>et al.</i> 2003    | NR               | NR                  |
| Jougon <i>et al.</i> 2003        | NR               | NR                  |
| Koullias <i>et al.</i> 2004      | NR               | NR                  |
| Weissberg & Weissberg 2004       | 23               | NR                  |
| Campillo-soto <i>et al.</i> 2005 | 5.6              | NR                  |
| Newcomb & Clarke 2005            | NR               | NR                  |
| Freixinet <i>et al.</i> 2005     | NR               | NR                  |
| Macia <i>et al.</i> 2007         | 42               | NR                  |
| Mondello <i>et al.</i> 2007      | NR               | NR                  |
| Caceres <i>et al.</i> 2008       | 39               | NR                  |
| Al-Mufarrej <i>et al.</i> 2008   | 5.9              | 9.42                |
| Takada <i>et al.</i> 2008        | 56               | 10.1                |
| Perna <i>et al.</i> 2010         | NR               | NR                  |
| Ryoo 2012                        | 44               | 10.03               |
| Okada <i>et al.</i> 2014         | NR               | 11.97               |
| Bakhos <i>et al.</i> 2014        | NR               | NR                  |
| Ebina <i>et al.</i> 2017         | NR               | NR                  |
| AVE ± std dev [n]                | 30.8±19.7 [7]    | WBC 10.4±1.1 [4]    |

**Table S3** Absence of effusions in spontaneous pneumomediastinum

| Study                                 | Effusion (%) |
|---------------------------------------|--------------|
| Abolnik <i>et al.</i> 1991            | NR           |
| Kaneki <i>et al.</i> 2000             | NR           |
| Gerazounis <i>et al.</i> 2003         | NR           |
| Jougon <i>et al.</i> 2003             | NR           |
| Koullias <i>et al.</i> 2004           | NR           |
| Weissberg & Weissberg 2004            | NR           |
| Campillo-soto <i>et al.</i> 2005      | NR           |
| Newcomb & Clarke 2005                 | NR           |
| Freixinet <i>et al.</i> 2005          | NR           |
| Macia <i>et al.</i> 2007              | NR           |
| Mondello <i>et al.</i> 2007           | NR           |
| Caceres <i>et al.</i> 2008            | 0            |
| Al-Mufarrej <i>et al.</i> 2008        | 0            |
| Takada <i>et al.</i> 2008             | NR           |
| Perna <i>et al.</i> 2010              | NR           |
| Ryoo 2012                             | NR           |
| Okada <i>et al.</i> 2014              | NR           |
| Bakhos <i>et al.</i> 2014             | 0            |
| Ebina <i>et al.</i> 2017              | NR           |
| Percent effusions (number of studies) | 0 [3]        |

**Table S4** Management of concurrent pneumothorax

| Study                            | Thoracostomies | Pneumothoraces | Pneumothorax treated with chest tube (%) |
|----------------------------------|----------------|----------------|------------------------------------------|
| Abolnik <i>et al.</i> 1991       | 1              | 3              | 33                                       |
| Kaneki <i>et al.</i> 2000        | NR             | NR             | NR                                       |
| Gerazounis <i>et al.</i> 2003    | NR             | NR             | NR                                       |
| Jougon <i>et al.</i> 2003        | NR             | NR             | NR                                       |
| Koullias <i>et al.</i> 2004      | 1              | 2              | 50                                       |
| Weissberg & Weissberg 2004       | 6              | 6              | 100                                      |
| Campillo-soto <i>et al.</i> 2005 | NR             | NR             | NR                                       |
| Newcomb & Clarke 2005            | 1              | 1              | 100                                      |
| Freixinet <i>et al.</i> 2005     | 1              | 2              | 50                                       |
| Macia <i>et al.</i> 2007         | NR             | NR             | NR                                       |
| Mondello <i>et al.</i> 2007      | 2              | 2              | 100                                      |
| Caceres <i>et al.</i> 2008       | 2              | 2              | 100                                      |
| Al-Mufarrej <i>et al.</i> 2008   | NR             | NR             | NR                                       |
| Takada <i>et al.</i> 2008        | 0              | 0              | NA                                       |
| Perna <i>et al.</i> 2010         | NR             | NR             | NR                                       |
| Ryoo 2012                        | NR             | NR             | NR                                       |
| Okada <i>et al.</i> 2014         | NR             | NR             | NR                                       |
| Bakhos <i>et al.</i> 2014        | NR             | NR             | NR                                       |
| Ebina <i>et al.</i> 2017         | NR             | NR             | NR                                       |
| SUM                              | 14             | 18             |                                          |
| AVE $\pm$ std dev [n]            |                |                | 76% $\pm$ 30.3 % [7]                     |

**Table S5** Primary spontaneous pneumomediastinum recurrence

| Study                            | Recurrence rate (%) | Follow up period (mos) |
|----------------------------------|---------------------|------------------------|
| Abolnik <i>et al.</i> 1991       | 4.3                 | 87±38                  |
| Kaneki <i>et al.</i> 2000        | 0                   | NR                     |
| Gerazounis <i>et al.</i> 2003    | 4.5                 | 36–144                 |
| Jougon <i>et al.</i> 2003        | 0                   | 3–60 (mean 19)         |
| Koullias <i>et al.</i> 2004      | 0                   | 36–120                 |
| Weissberg & Weissberg 2004       | 0                   | 12                     |
| Campillo-soto <i>et al.</i> 2005 | NR                  | NA                     |
| Newcomb & Clarke 2005            | 0                   | NR                     |
| Freixinet <i>et al.</i> 2005     | 0*                  | 12–228                 |
| Macia <i>et al.</i> 2007         | 1                   | NR                     |
| Mondello <i>et al.</i> 2007      | NR                  | NA                     |
| Caceres <i>et al.</i> 2008       | 0                   | 12–120                 |
| Al-Mufarrej <i>et al.</i> 2008   | 0                   | 0–34 (mean 6.72)       |
| Takada <i>et al.</i> 2008        | 0                   | 22                     |
| Perna <i>et al.</i> 2010         | NR                  | NA                     |
| Ryoo 2012                        | NR                  | NA                     |
| Okada <i>et al.</i> 2014         | 0                   | 0.5                    |
| Bakhos <i>et al.</i> 2014        | 2                   | 24–84                  |
| Ebina <i>et al.</i> 2017         | 2.9                 | NR                     |
| AVE ± std dev [n]                | 0.98%±1.6% [15]     |                        |

\*, 10 of the 32 patients (31.2%) were lost to follow up.
